# Supplementary material for: Organizational and Individual Interventions for Managing Work-Related Stress in Healthcare Professionals: A Systematic Review
Source: MDPI journal article supplement (doi:10.3390/medicina59101866), 2023-10-20
Supplement: s1 [file s1]

Supplementary Table S1. *Risk of bias assessment in non-randomized studies of intervention (NRSI).*

| First Author<br>(year of<br>publication) | <i>Pre-intervention domains</i> |                | <i>At-intervention<br/>domain</i> | <i>Post-intervention domains</i> |                |                     |                | Overall<br>risk of<br>bias |
|------------------------------------------|---------------------------------|----------------|-----------------------------------|----------------------------------|----------------|---------------------|----------------|----------------------------|
|                                          | Confounding<br>bias             | Selection bias | Information<br>bias               | Confounding<br>bias              | Selection bias | Information<br>bias | Reporting bias |                            |
| Dos Santos<br>(2015)                     | Low                             | Low            | Low                               | Moderate                         | Low            | Moderate            | Low            | Moderate                   |
| Kaimal (2019)                            | High                            | Moderate       | Moderate                          | Moderate                         | Low            | Moderate            | Moderate       | High                       |
| Luzarraga<br>(2019)                      | High                            | Moderate       | Moderate                          | Moderate                         | High           | Moderate            | Moderate       | High                       |
| Rinaldi (2019)                           | High                            | Low            | Moderate                          | Moderate                         | Moderate       | Moderate            | Moderate       | High                       |
| Sullivan<br>(2019)                       | Low                             | Low            | Moderate                          | Moderate                         | Moderate       | Moderate            | Moderate       | Moderate                   |
| Cunningham<br>(2021)                     | Moderate                        | Low            | High                              | Moderate                         | Low            | Moderate            | Moderate       | High                       |
| Lebares<br>(2021)                        | High                            | Moderate       | Low                               | Moderate                         | Moderate       | Moderate            | Low            | High                       |
| León-Pérez<br>(2021)                     | Moderate                        | Moderate       | Moderate                          | Moderate                         | Low            | Moderate            | Low            | High                       |
| Luton<br>(2021)                          | Low                             | Moderate       | Low                               | Moderate                         | High           | Moderate            | Moderate       | High                       |
| Tarquinio<br>(2021)                      | Low                             | High           | Low                               | Moderate                         | Low            | Moderate            | Low            | High                       |

Supplementary Table S2. *Risk of bias assessment in randomized clinical trials (RCTs).*

| First Author<br>(year of<br>publication) | Randomization<br>process | Deviation<br>from<br>intended<br>intervention | Missing<br>outcome<br>data | Measurement<br>of the<br>outcome | Selection<br>of the<br>reported<br>results | Overall<br>risk of<br>bias |
|------------------------------------------|--------------------------|-----------------------------------------------|----------------------------|----------------------------------|--------------------------------------------|----------------------------|
| Calder Calisi<br>(2017)                  | Low                      | Moderate                                      | Low                        | Moderate                         | Low                                        | Moderate                   |
| Axisa<br>(2019)                          | Low                      | Moderate                                      | Low                        | Moderate                         | Low                                        | Moderate                   |
| Watanabe<br>(2019)                       | Low                      | Low                                           | Low                        | Low                              | Low                                        | Low                        |
| Dincer<br>(2020)                         | Low                      | Moderate                                      | Low                        | Moderate                         | Low                                        | Moderate                   |
| Montaner<br>(2021)                       | Low                      | Moderate                                      | Low                        | Moderate                         | Low                                        | Moderate                   |
| West<br>(2021)                           | Low                      | Moderate                                      | Low                        | Moderate                         | Low                                        | Moderate                   |
| Haghighinejad<br>(2022)                  | Low                      | Moderate                                      | Low                        | Moderate                         | Low                                        | Moderate                   |
| Kavanaugh<br>(2022)                      | Low                      | Moderate                                      | Low                        | Moderate                         | Low                                        | Moderate                   |
